# Supplementary material for: The impact of news exposure on collective attention in the United States during the 2016 Zika epidemic
Source: PubMed Central journal article supplement (PMC7067377; doi:10.1371/journal.pcbi.1007633), 2020-03-12
Supplement: pcbi.1007633.s001.pdf [file pcbi.1007633.s001.pdf]

```
1 SELECT
2   *
3 FROM
4   [gdelt-bq:gdeltv2.gkg]
5 WHERE
6   DATE > 20160101000000
7   AND DATE < 20170101000000
8   AND V2Themes LIKE '%TAX_DISEASE_ZIKA%'
9   AND V2Locations LIKE '%1#United_States%'
```
