# Supplementary material for: The impact of news exposure on collective attention in the United States during the 2016 Zika epidemic
Source: PubMed Central journal article supplement (PMC7067377; doi:10.1371/journal.pcbi.1007633), 2020-03-12
Supplement: pcbi.1007633.s002.pdf [file pcbi.1007633.s002.pdf]

## Wikipedia pageview scaling

In our modeling framework, we consider a rescaling of page view data by state population. We estimate the scaling dependency of page view data with state population using the approach proposed by Leitão and collaborators [1]. To do so, we use the Python code made publicly available by the authors at the repository: <https://zenodo.org/record/49367#.W23yGP4zbdQ>.

In particular, we estimate the scaling exponent  $\beta$  of the relation

$$PV_s \propto N_s^\beta \quad (1)$$

by assuming a Log-normal form of the conditional probability  $P(y|x)$ , where  $y = PV_s$  are total page views by state and  $x = N_s$  is the state population.

The best estimate we obtain for the scaling exponent is  $\beta = 1.139675 \pm 0.205320$ .

## References

- [1] Leitao JC, Miotto JM, Gerlach M, Altmann EG. Is this scaling nonlinear?. Royal Society open science. 2016 Jul 1;3(7):150649.
