# Supplementary material for: The impact of news exposure on collective attention in the United States during the 2016 Zika epidemic
Source: PubMed Central journal article supplement (PMC7067377; doi:10.1371/journal.pcbi.1007633), 2020-03-12
Supplement: pcbi.1007633.s003.pdf [file pcbi.1007633.s003.pdf]

|    | language | page title             |    | language | page title      |
|----|----------|------------------------|----|----------|-----------------|
| 0  | ak       | Zika atiridii          | 34 | fa       | زىكا وىروس      |
| 1  | als      | Zika-Virus             | 35 | fa       | زىكا تب         |
| 2  | ar       | زىكا حمى               | 36 | fi       | Zikavirus       |
| 3  | ar       | زىكا فىروس             | 37 | fr       | Virus Zika      |
| 4  | arz      | زىكا فىروس             | 38 | frr      | Zika-wiirus     |
| 5  | as       | জিকা ভাইৰাছ            | 39 | gl       | Virus de Zika   |
| 6  | ast      | Virus del Zika         | 40 | gn       | Zika Akānundu   |
| 7  | az       | Zika virusu            | 41 | he       | זיקה נגיף       |
| 8  | bat-smg  | Zikas vérosos          | 42 | hi       | जिका वषिणु      |
| 9  | be       | Вірус Зіка             | 43 | hr       | Zika groznica   |
| 10 | be       | Ліхаманка Зіка         | 44 | ht       | Zika            |
| 11 | bg       | Треска Зика            | 45 | hu       | Zika-vírus      |
| 12 | bn       | জিকা জ্বর              | 46 | hy       | Զիքա ժարհ       |
| 13 | bn       | জিকা ভাইরাস            | 47 | ia       | Zika virus      |
| 14 | bs       | Zika virus             | 48 | id       | Demam Zika      |
| 15 | ca       | Febre de Zika          | 49 | id       | Virus Zika      |
| 16 | ca       | Virus del Zika         | 50 | ig       | Nje Zika        |
| 17 | ckb      | زىكا فاىروسى           | 51 | it       | Virus Zika      |
| 18 | cs       | Zika virus             | 52 | ja       | ジカウイルス          |
| 19 | cy       | Y Feirws Zika          | 53 | ja       | ジカ熱             |
| 20 | da       | Zikavirus              | 54 | ko       | 지카열             |
| 21 | de       | Zika-Virus             | 55 | ko       | 지카바이러스          |
| 22 | diq      | Virusê zika            | 56 | la       | Zika virus      |
| 23 | el       | Ασθένεια του ιού Ζίκα  | 57 | li       | Zikakoorts      |
| 24 | el       | Ιός Ζίκα               | 58 | lmo      | Virus Zika      |
| 25 | eml      | Virus Zika             | 59 | lo       | ໄວ໊ດຊິກ         |
| 26 | en       | Zika_virus             | 60 | lt       | Zika karštinė   |
| 27 | en       | Zika_fever             | 61 | lt       | Zika virusas    |
| 28 | eo       | Zika febro             | 62 | lv       | Zikas vīruss    |
| 29 | es       | Fiebre del Zika        | 63 | mk       | Зика (вирус)    |
| 30 | es       | Virus del Zika         | 64 | ml       | സിക് വൈറസ്      |
| 31 | et       | Zika-viirusinfektsioon | 65 | ml       | സിക് വൈറസ് രോഗം |
| 32 | et       | Zika viirus            | 66 | mn       | Зика вирус      |
| 33 | eu       | Zika birus             | 67 | ms       | Demam Zika      |

|     | language | page title      |     | language | page title                        |
|-----|----------|-----------------|-----|----------|-----------------------------------|
| 68  | ms       | Zika (virus)    | 102 | sr       | Зика вирус                        |
| 69  | my       | ဇီကာအဖျားရောဂါ  | 103 | sr       | Зика грозница                     |
| 70  | my       | ဇီကာပိုင်းရပ်စ် | 104 | ss       | Ifiva ye-Zika                     |
| 71  | mzn      | زىكا            | 105 | st       | Feberu ya Zika                    |
| 72  | ne       | जिका भाइरस      | 106 | sv       | Zikavirus                         |
| 73  | nl       | Zikavirus       | 107 | sv       | Zikafeber                         |
| 74  | nl       | Zikakoorts      | 108 | sw       | Homa ya Zika                      |
| 75  | no       | Zika-feber      | 109 | ta       | ஜிகா வைரஸ்                        |
| 76  | no       | Zika-virus      | 110 | te       | జికా వైరస్                        |
| 77  | nso      | Letadi la Zika  | 111 | th       | ໄວ໊ສ໊ອິກາ                         |
| 78  | ny       | Matenda a Zika  | 112 | th       | ໄປ໊ອິກາ                           |
| 79  | oc       | Fèbre de Zika   | 113 | ti       | ረሰኒ ዚካ                            |
| 80  | oc       | Virus de Zika   | 114 | tr       | Zika ateşi                        |
| 81  | om       | Qandhoon Zikkaa | 115 | tr       | Zika virüsü                       |
| 82  | or       | ଜିକା ଭୂତାଣୁ     | 116 | ts       | Mukhuhlwana wa Zika               |
| 83  | or       | ଜିକା ଜ୍ୱର       | 117 | uk       | Вірус Зіка                        |
| 84  | pa       | ਜੀਕਾ ਵਾਇਰਸ      | 118 | uk       | Хвороба, яку спричинює вірус Зіка |
| 85  | pl       | Wirus Zika      | 119 | ur       | وائرس زىكا                        |
| 86  | pt       | Vírus da Zika   | 120 | vi       | Virus Zika                        |
| 87  | pt       | Febre Zika      | 121 | xh       | Umkhuhlane i-Zika                 |
| 88  | ro       | Febra Zika      | 122 | xmf      | ზიკაჲ ლახარა                      |
| 89  | ro       | Virusul Zika    | 123 | xmf      | ზიკაჲ ვირუსი                      |
| 90  | ru       | Лихорадка Зика  | 124 | yo       | Ibà Zika                          |
| 91  | ru       | Вирус Зика      | 125 | zh       | 茲卡熱                               |
| 92  | sco      | Zika virus      | 126 | zh       | 茲卡病毒                              |
| 93  | sh       | Zika virus      | 127 | zh-yue   | 茲卡病毒                              |
| 94  | si       | සීක වෛරසය       |     |          |                                   |
| 95  | simple   | Zika fever      |     |          |                                   |
| 96  | simple   | Zika virus      |     |          |                                   |
| 97  | sk       | Vírus Zika      |     |          |                                   |
| 98  | sl       | Mrzlica zika    |     |          |                                   |
| 99  | sl       | Virus zika      |     |          |                                   |
| 100 | sn       | Zika fivha      |     |          |                                   |
| 101 | sq       | Virusi Zika     |     |          |                                   |

Table S1: **Wikipedia pages under study.** Full list of the 128 Wikipedia pages whose page view counts were monitored in the study. The field language refers to the language codes defined by ISO 639-1 and ISO 639-3.
