# Supplementary material for: The impact of news exposure on collective attention in the United States during the 2016 Zika epidemic
Source: PubMed Central journal article supplement (PMC7067377; doi:10.1371/journal.pcbi.1007633), 2020-03-12
Supplement: pcbi.1007633.s005.pdf [file pcbi.1007633.s005.pdf]

| State | Spearman $\rho$ | p-value     | Pearson $r$ | p-value     | State | Spearman $\rho$ | p-value     | Pearson $r$ | p-value |
|-------|-----------------|-------------|-------------|-------------|-------|-----------------|-------------|-------------|---------|
| TX    | 0.76            | $< 10^{-3}$ | 0.748       | $< 10^{-3}$ | KY    | 0.59            | $< 10^{-3}$ | 0.204       | 0.142   |
| AR    | 0.63            | $< 10^{-3}$ | 0.732       | $< 10^{-3}$ | NJ    | 0.59            | $< 10^{-3}$ | 0.192       | 0.167   |
| VA    | 0.60            | $< 10^{-3}$ | 0.714       | $< 10^{-3}$ | ID    | 0.62            | $< 10^{-3}$ | 0.189       | 0.176   |
| NE    | 0.52            | $< 10^{-3}$ | 0.699       | $< 10^{-3}$ | VT    | 0.62            | $< 10^{-3}$ | 0.172       | 0.219   |
| MN    | 0.59            | $< 10^{-3}$ | 0.662       | $< 10^{-3}$ | MS    | 0.59            | $< 10^{-3}$ | 0.163       | 0.243   |
| CO    | 0.59            | $< 10^{-3}$ | 0.630       | $< 10^{-3}$ | KS    | 0.38            | 0.005       | 0.159       | 0.255   |
| CA    | 0.66            | $< 10^{-3}$ | 0.629       | $< 10^{-3}$ | RI    | 0.38            | 0.005       | 0.143       | 0.307   |
| IL    | 0.71            | $< 10^{-3}$ | 0.618       | $< 10^{-3}$ | OH    | 0.55            | $< 10^{-3}$ | 0.139       | 0.321   |
| IA    | 0.49            | $< 10^{-3}$ | 0.617       | $< 10^{-3}$ | WV    | 0.48            | $< 10^{-3}$ | 0.127       | 0.365   |
| MA    | 0.49            | $< 10^{-3}$ | 0.590       | $< 10^{-3}$ | OK    | 0.57            | $< 10^{-3}$ | 0.126       | 0.370   |
| OR    | 0.68            | $< 10^{-3}$ | 0.525       | $< 10^{-3}$ | MO    | 0.54            | $< 10^{-3}$ | 0.111       | 0.427   |
| HI    | 0.71            | $< 10^{-3}$ | 0.519       | $< 10^{-3}$ | TN    | 0.48            | $< 10^{-3}$ | 0.110       | 0.433   |
| FL    | 0.76            | $< 10^{-3}$ | 0.484       | $< 10^{-3}$ | WY    | 0.41            | 0.002       | 0.109       | 0.439   |
| DC    | 0.66            | $< 10^{-3}$ | 0.476       | $< 10^{-3}$ | NV    | 0.52            | $< 10^{-3}$ | 0.102       | 0.466   |
| NY    | 0.66            | $< 10^{-3}$ | 0.423       | 0.002       | ND    | 0.30            | 0.030       | 0.095       | 0.498   |
| WA    | 0.59            | $< 10^{-3}$ | 0.389       | 0.004       | LA    | 0.59            | $< 10^{-3}$ | 0.088       | 0.531   |
| DE    | 0.55            | $< 10^{-3}$ | 0.353       | 0.010       | IN    | 0.64            | $< 10^{-3}$ | 0.087       | 0.537   |
| AL    | 0.60            | $< 10^{-3}$ | 0.320       | 0.020       | SD    | 0.42            | 0.002       | 0.085       | 0.543   |
| MD    | 0.58            | $< 10^{-3}$ | 0.292       | 0.034       | SC    | 0.46            | 0.001       | 0.076       | 0.587   |
| GA    | 0.51            | $< 10^{-3}$ | 0.283       | 0.040       | AZ    | 0.56            | $< 10^{-3}$ | 0.062       | 0.660   |
| MI    | 0.48            | $< 10^{-3}$ | 0.269       | 0.052       | NC    | 0.33            | 0.017       | 0.039       | 0.780   |
| NH    | 0.68            | $< 10^{-3}$ | 0.262       | 0.058       | ME    | 0.46            | 0.001       | 0.017       | 0.902   |
| PA    | 0.54            | $< 10^{-3}$ | 0.261       | 0.059       | NM    | 0.50            | $< 10^{-3}$ | 0.016       | 0.909   |
| CT    | 0.46            | $< 10^{-3}$ | 0.243       | 0.080       | UT    | 0.39            | 0.004       | 0.008       | 0.955   |
| MT    | 0.40            | 0.003       | 0.205       | 0.141       | WI    | 0.35            | 0.011       | 0.004       | 0.978   |

Table S3: **Correlations between Wikipedia pageviews and news mentioning Zika by state.** All states are ranked by Pearson's  $r$  values, in descending order.
