# Supplementary material for: The impact of news exposure on collective attention in the United States during the 2016 Zika epidemic
Source: PubMed Central journal article supplement (PMC7067377; doi:10.1371/journal.pcbi.1007633), 2020-03-12
Supplement: pcbi.1007633.s006.pdf [file pcbi.1007633.s006.pdf]

| State     | Spearman $\rho$ | p-value      | Pearson $r$  | p-value      | State | Spearman $\rho$ | p-value | Pearson $r$ | p-value |
|-----------|-----------------|--------------|--------------|--------------|-------|-----------------|---------|-------------|---------|
| <b>MT</b> | <b>0.36</b>     | <b>0.008</b> | <b>0.328</b> | <b>0.017</b> | DE    | 0.00            | 0.984   | -0.082      | 0.561   |
| WV        | 0.24            | 0.087        | 0.099        | 0.480        | SC    | -0.02           | 0.882   | -0.085      | 0.546   |
| LA        | 0.11            | 0.425        | 0.091        | 0.517        | NV    | -0.04           | 0.786   | -0.086      | 0.541   |
| OK        | 0.26            | 0.057        | 0.009        | 0.949        | KS    | -0.01           | 0.952   | -0.090      | 0.520   |
| AL        | 0.09            | 0.505        | -0.002       | 0.990        | NJ    | 0.04            | 0.801   | -0.093      | 0.506   |
| ID        | 0.07            | 0.642        | -0.003       | 0.981        | VT    | -0.02           | 0.891   | -0.095      | 0.499   |
| HI        | 0.14            | 0.327        | -0.005       | 0.974        | MN    | 0.08            | 0.590   | -0.098      | 0.486   |
| CT        | 0.21            | 0.136        | -0.013       | 0.929        | NH    | -0.06           | 0.662   | -0.101      | 0.470   |
| NE        | 0.06            | 0.650        | -0.014       | 0.918        | DC    | -0.08           | 0.590   | -0.102      | 0.465   |
| MO        | 0.13            | 0.371        | -0.025       | 0.861        | WA    | 0.14            | 0.307   | -0.107      | 0.445   |
| WY        | 0.00            | 0.974        | -0.035       | 0.804        | OR    | -0.05           | 0.701   | -0.115      | 0.414   |
| NM        | 0.05            | 0.730        | -0.035       | 0.802        | IN    | 0.10            | 0.485   | -0.119      | 0.395   |
| MS        | 0.17            | 0.233        | -0.036       | 0.798        | WI    | -0.05           | 0.730   | -0.121      | 0.389   |
| TN        | 0.18            | 0.187        | -0.036       | 0.796        | OH    | -0.01           | 0.967   | -0.125      | 0.374   |
| MI        | 0.23            | 0.100        | -0.041       | 0.769        | AZ    | -0.04           | 0.760   | -0.125      | 0.373   |
| KY        | 0.12            | 0.373        | -0.045       | 0.751        | PA    | 0.14            | 0.322   | -0.125      | 0.371   |
| FL        | 0.20            | 0.161        | -0.046       | 0.741        | RI    | -0.09           | 0.538   | -0.128      | 0.361   |
| IL        | 0.09            | 0.523        | -0.049       | 0.730        | CA    | -0.07           | 0.613   | -0.130      | 0.354   |
| AR        | 0.06            | 0.684        | -0.057       | 0.687        | UT    | -0.12           | 0.395   | -0.132      | 0.347   |
| SD        | -0.03           | 0.818        | -0.063       | 0.655        | NY    | 0.13            | 0.354   | -0.132      | 0.346   |
| NC        | 0.08            | 0.578        | -0.065       | 0.644        | VA    | 0.08            | 0.551   | -0.132      | 0.345   |
| IA        | 0.07            | 0.613        | -0.074       | 0.601        | MD    | 0.11            | 0.433   | -0.133      | 0.341   |
| GA        | 0.13            | 0.354        | -0.074       | 0.599        | CO    | 0.05            | 0.737   | -0.137      | 0.327   |
| ND        | -0.08           | 0.549        | -0.078       | 0.577        | MA    | 0.06            | 0.645   | -0.145      | 0.301   |
| ME        | 0.10            | 0.466        | -0.079       | 0.574        | TX    | 0.07            | 0.640   | -0.152      | 0.278   |

Table S4: **Correlations between Wikipedia pageviews and ZIKV incidence by state.** All states are ranked by Pearson's  $r$  values, in descending order.
