# Supplementary material for: The impact of news exposure on collective attention in the United States during the 2016 Zika epidemic
Source: PubMed Central journal article supplement (PMC7067377; doi:10.1371/journal.pcbi.1007633), 2020-03-12
Supplement: pcbi.1007633.s007.pdf [file pcbi.1007633.s007.pdf]

| State | Spearman $\rho$ | p-value | Pearson $r$ | p-value     | State | Spearman $\rho$ | p-value | Pearson $r$ | p-value |
|-------|-----------------|---------|-------------|-------------|-------|-----------------|---------|-------------|---------|
| AL    | 0.32            | 0.020   | 0.538       | $< 10^{-3}$ | RI    | 0.22            | 0.114   | 0.057       | 0.686   |
| TN    | 0.23            | 0.097   | 0.514       | $< 10^{-3}$ | KY    | 0.29            | 0.035   | 0.056       | 0.690   |
| NC    | 0.17            | 0.212   | 0.432       | 0.001       | WA    | 0.19            | 0.182   | 0.046       | 0.742   |
| NY    | 0.35            | 0.011   | 0.431       | 0.001       | MI    | 0.02            | 0.863   | 0.044       | 0.756   |
| PA    | 0.35            | 0.010   | 0.407       | 0.002       | TX    | 0.20            | 0.150   | 0.026       | 0.852   |
| SC    | 0.15            | 0.297   | 0.397       | 0.003       | MN    | 0.15            | 0.299   | 0.023       | 0.869   |
| WV    | 0.22            | 0.107   | 0.372       | 0.006       | AZ    | 0.08            | 0.591   | 0.014       | 0.923   |
| ID    | -0.04           | 0.802   | 0.365       | 0.007       | ND    | 0.00            | 1.000   | 0.009       | 0.950   |
| GA    | 0.24            | 0.085   | 0.351       | 0.010       | OK    | 0.10            | 0.463   | 0.009       | 0.950   |
| FL    | 0.42            | 0.002   | 0.334       | 0.014       | CO    | 0.07            | 0.628   | 0.009       | 0.952   |
| WI    | 0.24            | 0.079   | 0.309       | 0.024       | NJ    | 0.13            | 0.341   | 0.001       | 0.997   |
| IN    | 0.27            | 0.052   | 0.251       | 0.069       | OR    | 0.03            | 0.835   | -0.000      | 0.998   |
| IA    | 0.32            | 0.022   | 0.204       | 0.143       | CA    | 0.01            | 0.940   | -0.006      | 0.969   |
| MO    | 0.21            | 0.140   | 0.185       | 0.185       | NE    | 0.11            | 0.454   | -0.022      | 0.875   |
| UT    | 0.23            | 0.100   | 0.153       | 0.273       | AR    | 0.18            | 0.196   | -0.025      | 0.859   |
| KS    | 0.12            | 0.410   | 0.151       | 0.281       | WY    | 0.00            | 0.974   | -0.040      | 0.778   |
| MD    | 0.16            | 0.247   | 0.133       | 0.342       | NV    | 0.04            | 0.761   | -0.041      | 0.771   |
| MT    | 0.11            | 0.424   | 0.117       | 0.404       | DE    | 0.02            | 0.881   | -0.042      | 0.765   |
| VA    | 0.25            | 0.076   | 0.113       | 0.421       | NM    | 0.05            | 0.742   | -0.046      | 0.741   |
| MS    | 0.21            | 0.124   | 0.111       | 0.430       | ME    | 0.07            | 0.640   | -0.059      | 0.672   |
| DC    | 0.18            | 0.186   | 0.080       | 0.571       | MA    | 0.16            | 0.247   | -0.063      | 0.653   |
| HI    | 0.08            | 0.571   | 0.077       | 0.585       | CT    | 0.09            | 0.545   | -0.077      | 0.584   |
| IL    | 0.19            | 0.183   | 0.075       | 0.592       | OH    | 0.14            | 0.306   | -0.078      | 0.576   |
| NH    | 0.03            | 0.853   | 0.065       | 0.643       | SD    | -0.22           | 0.122   | -0.082      | 0.557   |
| LA    | 0.24            | 0.079   | 0.064       | 0.649       | VT    | -0.12           | 0.379   | -0.096      | 0.493   |

Table S5: **Correlations between news mentioning Zika and ZIKV incidence by state.** All states are ranked by Pearson's  $r$  values, in descending order.
