# Supplementary material for: The impact of news exposure on collective attention in the United States during the 2016 Zika epidemic
Source: PubMed Central journal article supplement (PMC7067377; doi:10.1371/journal.pcbi.1007633), 2020-03-12
Supplement: pcbi.1007633.s008.pdf [file pcbi.1007633.s008.pdf]

| <b>Features</b>                    | $a$                   | $b$                   | $c$                    | $d$                    | $e$                   |
|------------------------------------|-----------------------|-----------------------|------------------------|------------------------|-----------------------|
| TV                                 | $5.70 \times 10^{-8}$ | -                     | -                      | -                      | -                     |
| Web                                | -                     | $1.42 \times 10^{-8}$ | -                      | -                      | -                     |
| TV, Web                            | $4.15 \times 10^{-8}$ | $4.48 \times 10^{-9}$ | -                      | -                      | -                     |
| TV, m(TV)                          | $7.93 \times 10^{-8}$ | -                     | -                      | $-1.27 \times 10^{-8}$ | -                     |
| Web, m(Web)                        | -                     | $2.23 \times 10^{-8}$ | $-4.06 \times 10^{-9}$ | -                      | -                     |
| TV, Web, m(TV)                     | $6.15 \times 10^{-8}$ | $5.41 \times 10^{-9}$ | -                      | $5.41 \times 10^{-9}$  | -                     |
| TV, Web, m(Web)                    | $4.61 \times 10^{-8}$ | $1.23 \times 10^{-8}$ | $-4.49 \times 10^{-9}$ | -                      | -                     |
| TV, Web, m(TV), m(Web)             | $4.59 \times 10^{-8}$ | $1.24 \times 10^{-8}$ | $-4.51 \times 10^{-9}$ | $1.18 \times 10^{-10}$ | -                     |
| TV, Web, m(TV), m(Web), state_news | $4.61 \times 10^{-8}$ | $1.20 \times 10^{-8}$ | $-4.55 \times 10^{-8}$ | $2.19 \times 10^{-10}$ | $1.05 \times 10^{-8}$ |

Table S6: **Parameters of the best fitted models for all selected features.** The table reports the values of the fitted coefficients for the best models and the corresponding features. The full model with all the 5 features under consideration takes the following form:  $PV_s(w) = a \cdot \text{TV}(w) + b \cdot \text{Web}(w) + c \cdot m(\text{Web}) + d \cdot m(\text{TV}) + e \cdot \text{Web}_{state}(w)$ .
