# Supplementary material for: The impact of news exposure on collective attention in the United States during the 2016 Zika epidemic
Source: PubMed Central journal article supplement (PMC7067377; doi:10.1371/journal.pcbi.1007633), 2020-03-12
Supplement: pcbi.1007633.s009.pdf [file pcbi.1007633.s009.pdf]

Table S7: **Comparison of model performance for 49 states and D.C.** For each feature, the average  $R^2$ , Pearson  $r$ , Spearman  $\rho$ , computed over 50 states are reported. Average values of  $R^2$ ,  $r$  and  $\rho$  are computed under K-fold cross-validation ( $k = 10$ ). The standard deviation is reported in parenthesis.

| <b>Features</b>                    | $R^2$          | Pearson $r$    | Spearman $\rho$ |
|------------------------------------|----------------|----------------|-----------------|
| ZIKV                               | -0.378 (0.081) | -0.036 (0.029) | 0.1366 (0.079)  |
| TV                                 | 0.5083 (0.181) | 0.7714 (0.098) | 0.7633 (0.048)  |
| Web                                | 0.4352 (0.158) | 0.7485 (0.096) | 0.7702 (0.048)  |
| TV, Web                            | 0.5241 (0.184) | 0.7901 (0.100) | 0.7898 (0.050)  |
| TV, m(TV)                          | 0.5923 (0.207) | 0.8344 (0.107) | 0.7599 (0.046)  |
| Web, m(Web)                        | 0.5298 (0.191) | 0.7860 (0.101) | 0.7018 (0.044)  |
| TV, Web, m(TV)                     | 0.6152 (0.211) | 0.8426 (0.108) | 0.7700 (0.046)  |
| TV, Web, m(Web)                    | 0.6385 (0.223) | 0.8601 (0.109) | 0.7747 (0.048)  |
| TV, Web, m(TV), m(Web)             | 0.6384 (0.223) | 0.8600 (0.109) | 0.7749 (0.049)  |
| TV, Web, m(TV), m(Web), state_news | 0.5080 (0.308) | 0.8294 (0.096) | 0.7498 (0.037)  |
