# Supplementary material for: The impact of news exposure on collective attention in the United States during the 2016 Zika epidemic
Source: PLOS journal article supplement (doi:10.1371/journal.pcbi.1007633), 2020-03-12
Supplement: S4 (10.1371/journal.pcbi.1007633.s004) [file journal.pcbi.1007633.s004]

|           | Wikipedia | News | TV   |
|-----------|-----------|------|------|
| Wikipedia | 1.0       | 0.74 | 0.80 |
| News      | 0.74      | 1.0  | 0.78 |
| TV        | 0.80      | 0.78 | 1.0  |

Table S2: **Correlations between Wikipedia pageviews, the Web news mentioning Zika and TV close captions in 2016.** The table reports the Pearson’s correlation coefficient  $r$  for the Wikipedia page view counts, the Web news mentioning Zika and the TV close captions at national level. All values of  $r$  are statistically significant at  $p < 10^{-4}$ .
